# Supplementary material for: Endogenous Retrotransposition Activates Oncogenic Pathways in Hepatocellular Carcinoma
Source: PubMed Central journal article supplement (PMC3898742; doi:10.1016/j.cell.2013.02.032), 2013-03-28
Supplement: mmc7.pdf [file mmc7.pdf]

Table S7. *Mdr2*<sup>-/-</sup> Mouse TaqMan qPCR *ST18* Copy Number Analysis, Related to Figure 6

| Mouse ID | Nodule | Sex | Age (months) | Nodule size (cm) | Histology (% HCC) | <i>ST18</i> copy number |
|----------|--------|-----|--------------|------------------|-------------------|-------------------------|
| 215      | 1      | M   | 14           | 1.8              | 80                | 2                       |
| 51505    | 1      | M   | 14           | 0.7              | 0                 | 2                       |
| 51505    | 2      | M   | 14           | -                | 80                | 2                       |
| 60123    | 1      | M   | 14           | 0.6              | 0                 | 2                       |
| 218      | 1      | M   | 15           | 1                | 50                | 3                       |
| 218      | 2      | M   | 15           | 3                | 90                | 2                       |
| 218      | 3      | M   | 15           | 1                | 70                | 2                       |
| 58853    | 1      | M   | 15           | 1.5              | 10                | 2                       |
| 58853    | 2      | M   | 15           | 4                | 10                | 2                       |
| 58853    | 3      | M   | 15           | 1.7              | 60                | 2                       |
| 58853    | 4      | M   | 15           | 1                | 10                | 2                       |
| 58163    | 1      | M   | 15           | 4                | 10                | 2                       |
| 58163    | 2      | M   | 15           | 1.3              | 10                | 2                       |
| 58163    | 3      | M   | 15           | 3                | 70                | 4                       |
| 58163    | 4      | M   | 15           | 3                | 70                | 2                       |
| 51509    | 1      | M   | 16           | 1.5              | 20                | 2                       |
| 51509    | 2      | M   | 16           | 1.1              | 20                | 2                       |
| 51509    | 3      | M   | 16           | 0.8              | 20                | 2                       |
| 51509    | 4      | M   | 16           | 1.1              | 0                 | 2                       |
| 60400    | 1      | F   | 13           | 0.9              | 60                | 2                       |
| 60400    | 2      | F   | 13           | 1.4              | 40                | 2                       |
| 60400    | 3      | F   | 13           | 0.5              | 10                | 2                       |
| 60400    | 4      | F   | 13           | 0.5              | 10                | 2                       |
| 52686    | 1      | F   | 15           | 1                | 20                | 2                       |
| 52686    | 2      | F   | 15           | 0.7              | 50                | 3                       |
| 52687    | 1      | F   | 15           | 1.3              | 0                 | 2                       |
| 52687    | 2      | F   | 15           | 0.9              | 20                | 3                       |

27 nodules from 10 animals were assessed for HCC stage by pathological examination and *ST18* CNV was detected by TaqMan qRT-PCR (see Extended Experimental Procedures). HCC was found in 23 nodules. 4 HCC nodules from 4 different animals presented amplified *ST18* (highlighted in green). 3 out of 4 nodules (75%) with amplified *ST18* showed high % HCC ( $\geq 50\%$ ). *ST18* copy number was 2 for all remaining nodules.

Table S8. Oligonucleotides for L1 Promoter Bisulphite Sequencing, HBV Detection, qRT-PCR, and ChIP-qPCR, Related to Experimental Procedures

| Oligonucleotide name                            | Oligonucleotide sequence   |
|-------------------------------------------------|----------------------------|
| <b><u>L1 promoter bisulphite sequencing</u></b> |                            |
| L1_Bis-F                                        | AAGGGGTTAGGGAGTTTTTTT      |
| L1_Bis-R                                        | TATCTATACCCTACCCCCAAA      |
| <b><u>HBV detection</u></b>                     |                            |
| HBV_s_459-F                                     | AGGTATGTTGCCCGTTTGTCCT     |
| HBV_s_1001-R                                    | CAGCAAAGCCCAAAGACCCAC      |
| HBV_x_1174-F                                    | TGCCAAGTGTTTGCTGACGC       |
| HBV_x_1627-R                                    | GTTACGGTGGTCTCCATG         |
| <b><u>Human genes qRT-PCR</u></b>               |                            |
| TBP-F                                           | GCAAGGGTTTCTGGTTTGCC       |
| TBP-R                                           | GGGTCAGTCCAGTGCCATAA       |
| MCC-F                                           | TATGGAAACGACTCCTCGGC       |
| MCC-R                                           | TCTCATGAGGTGGGACTGCT       |
| ST18-F                                          | CGTGCCAGCTCTTATAGCTACG     |
| ST18-R                                          | TATTTCCGGCTCCCTTGGCAT      |
| EFHD1-F                                         | GCTCATTTTCCACAAGGCCG       |
| EFHD1-R                                         | TGACAAGGCTTGGACCTTGG       |
| SLC2A1-F                                        | GGCTTCTCCAACCTGGACCTC      |
| SLC2A1-R                                        | CCGGAAGCGATCTCATCGAA       |
| PHGDH-F                                         | CCAATGGGAACAGCCTCAGT       |
| PHGDH-R                                         | CTCCCATTTGCCGTCCTTCA       |
| <b><u>Human L1 TaqMan qRT-PCR</u></b>           |                            |
| L1-5'-UTR-F                                     | ACAGCTTTGAAGAGAGCAGTGGTT   |
| L1-5'-UTR-R                                     | AGTCTGCCCGTTCTCAGATCT      |
| L1-5'-UTR-probe                                 | VIC-TCCCAGCACGCAGC-MGB     |
| L1-ORF2-F                                       | TGCGGAGAAATAGGAACACTTTT    |
| L1-ORF2-R                                       | TGAGGAATCGCCACACTGACT      |
| L1-ORF2-probe                                   | VIC-CTGTAAACTAGTTCAACC-MGB |
| L1-RT                                           | ACATGTGCACATTGTGCAGGTTAG   |
| <b><u>Mouse ST18 qRT-PCR</u></b>                |                            |
| mouse_ST18-F                                    | TGGATGCCGAGGTTGAAGAT       |
| mouse_ST18-R                                    | TCAGCTCTCCTCTTCTTCGC       |
| mouse_TBP-F                                     | CTGGAATTGTACCGCAGCTT       |
| mouse_TBP-R                                     | ATGATGACTGCAGCAAATCG       |
| <b><u>Human ST18 ChIP-qPCR</u></b>              |                            |
| ChIP-ST18-F                                     | GCACACATCCCCAAAAGAAT       |
| ChIP-ST18-R                                     | CCTGCTATGAATTTTCCATGA      |
| ChIP-GAPDH-F                                    | TCGACAGTCAGCCGCATCT        |
| ChIP-GAPDH-R                                    | CTAGCCTCCCGGGTTTCTCT       |
